# Supplementary material for: Loseolamycins: A Group of New Bioactive Alkylresorcinols Produced after Heterologous Expression of a Type III PKS from Micromonospora endolithica
Source: PubMed Central journal article supplement (PMC7587189; doi:10.3390/molecules25204594), 2020-10-09
Supplement: molecules-25-04594-s001.pdf [file molecules-25-04594-s001.pdf]

1 Article

2 **Loseolamycins: a group of new bioactive**  
3 **alkylresorcinols produced after heterologous**  
4 **expression of a type III PKS from *Micromonospora***  
5 ***endolithica***

6 **Constanze Lasch <sup>1</sup>, Nils Gummerlich <sup>1</sup>, Maksym Myronovskyi <sup>1</sup>, Anja Paluszczak <sup>1</sup>, Josef Zapp <sup>2</sup>**  
7 **and Andriy Luzhetskyy <sup>1,3,\*</sup>**

8 <sup>1</sup> Pharmazeutische Biotechnologie, Universität des Saarlandes, Saarbrücken, Germany;  
9 constanze.lasch@uni-saarland.de (C.L.), nils.gummerlich@gmx.de (N.G.);  
10 maksym.myronovskyi@uni-saarland.de (M.M.); anja.paluszczak@uni-saarland.de (A.P.);  
11 a.luzhetskyy@mx.uni-saarland.de (A.L.)

12 <sup>2</sup> Pharmazeutische Biologie, Universität des Saarlandes, Saarbrücken, Germany; j.zapp@mx.uni-saarland.de  
13 (J.Z.)

14 <sup>3</sup> Helmholtz-Institut für Pharmazeutische Forschung Saarland, Saarbrücken, Germany

15 \* Correspondence: a.luzhetskyy@mx.uni-saarland.de; +49 681 302 70200 (A.L.)

16 Received: date; Accepted: date; Published: date

17

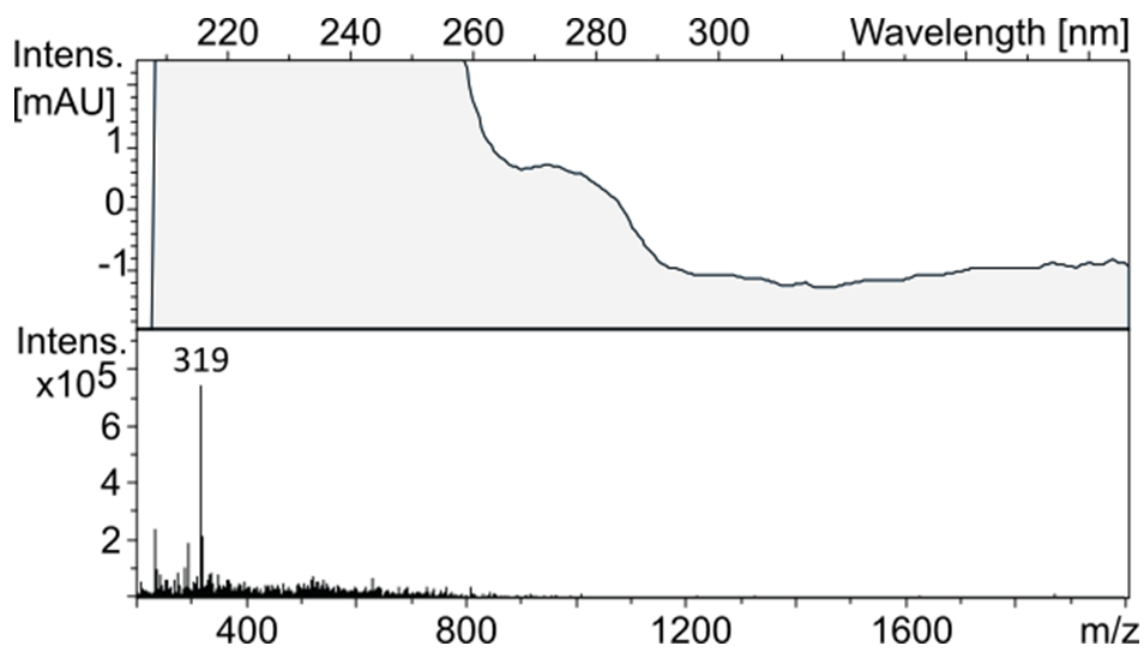

18

19 *Figure S1. UV/Vis spectrum of loseolamycin A1.*

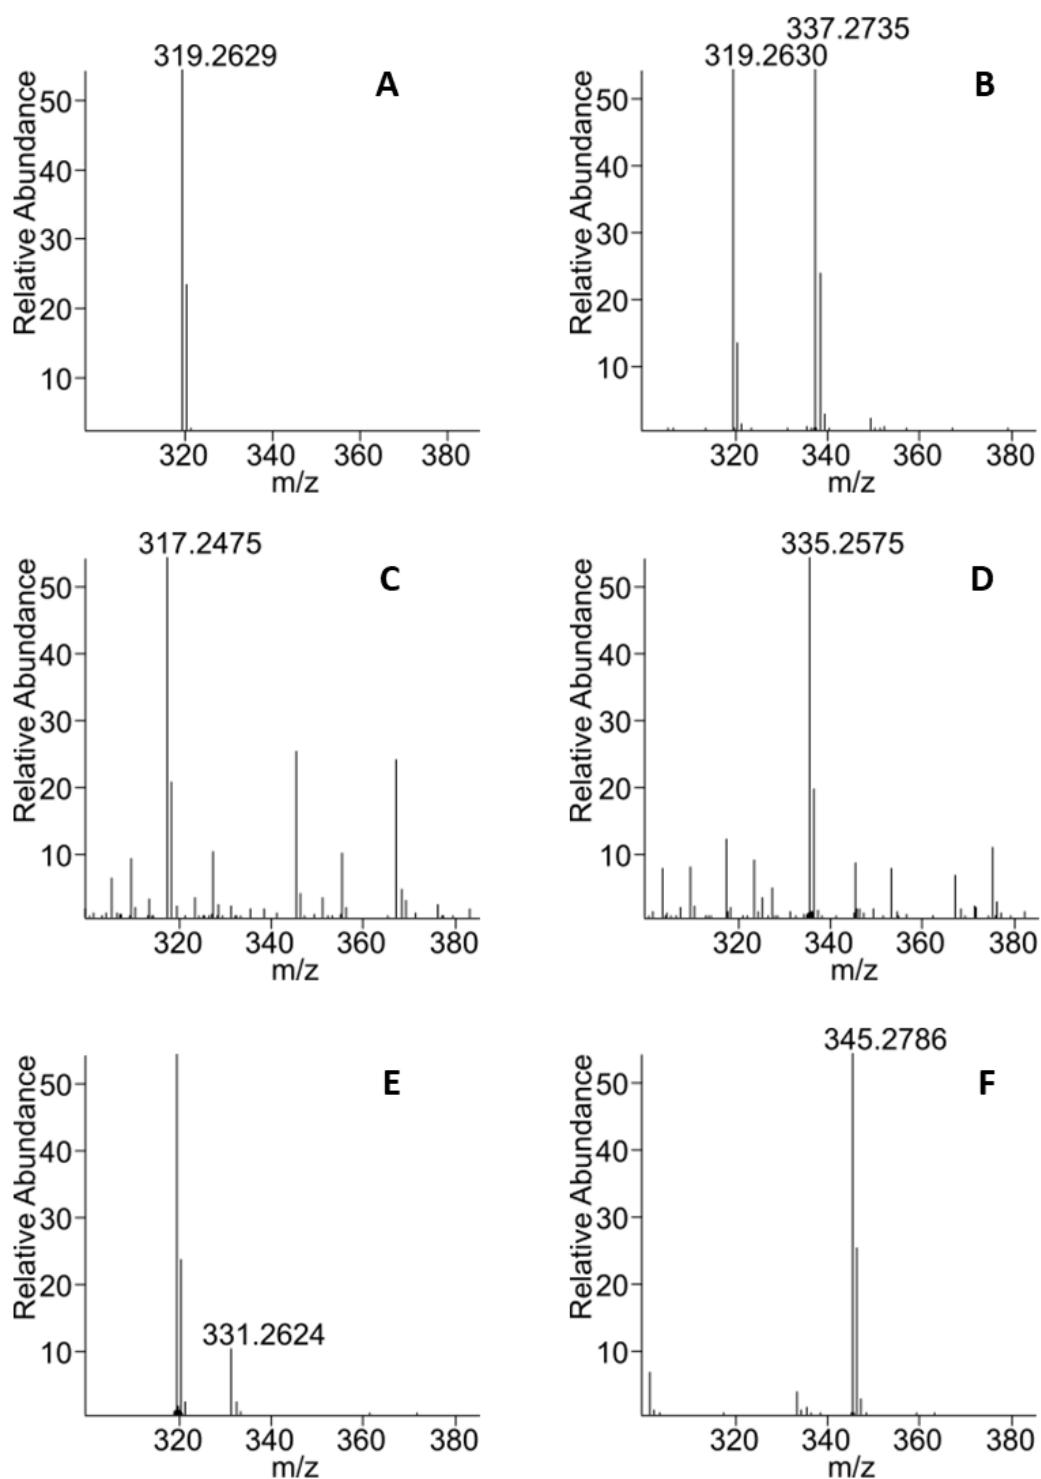

20

21 *Figure S2. Mass spectra of loseolamycins using positive ionization mode. A - compound 1, B - compound 2, C - compound*22 *3, D - compound 4, E - compound 5, F - compound 6.*

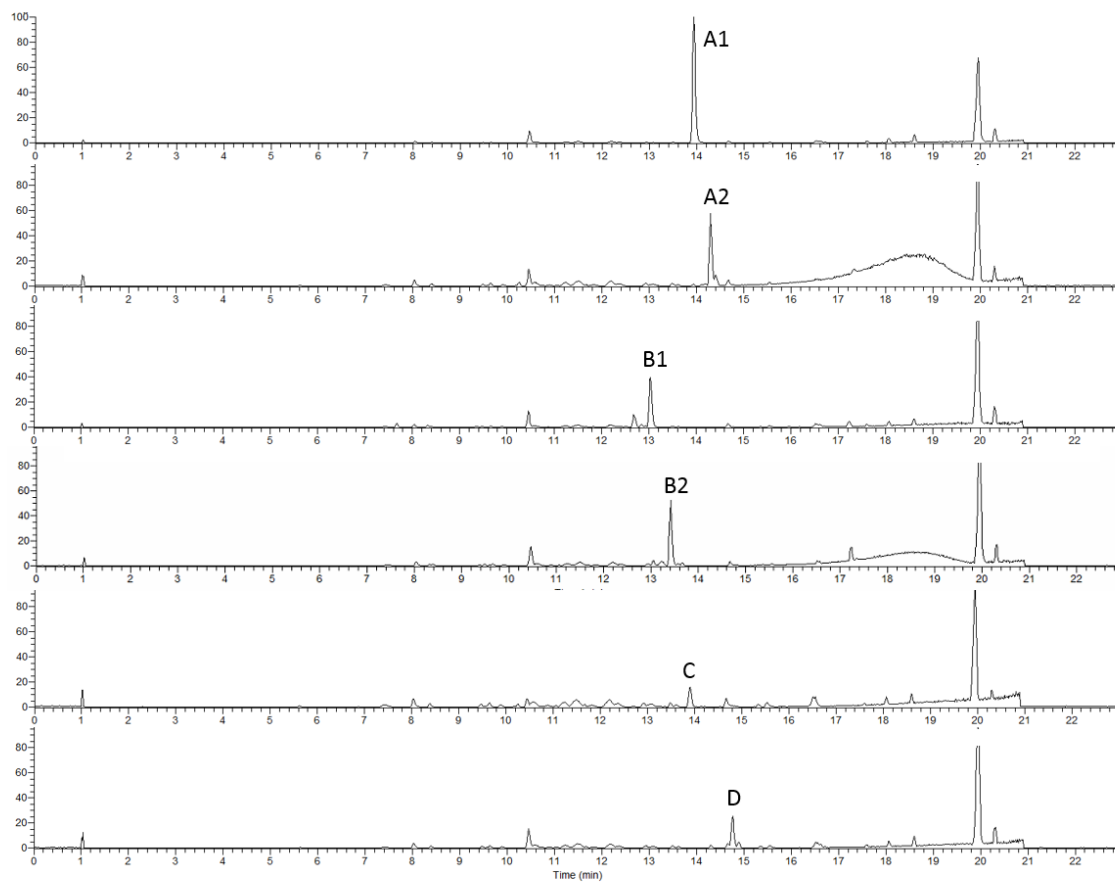

23

24 **Figure S3.** Purity of the isolated loseolamycin derivatives A1 (compound 1), A2 (compound 2), B1 (compound 3), B2  
25 (compound 4), C (compound 5) and D (compound 6) after two chromatographic steps. Base Peak Chromatograms (BPC)  
26 are shown.

27

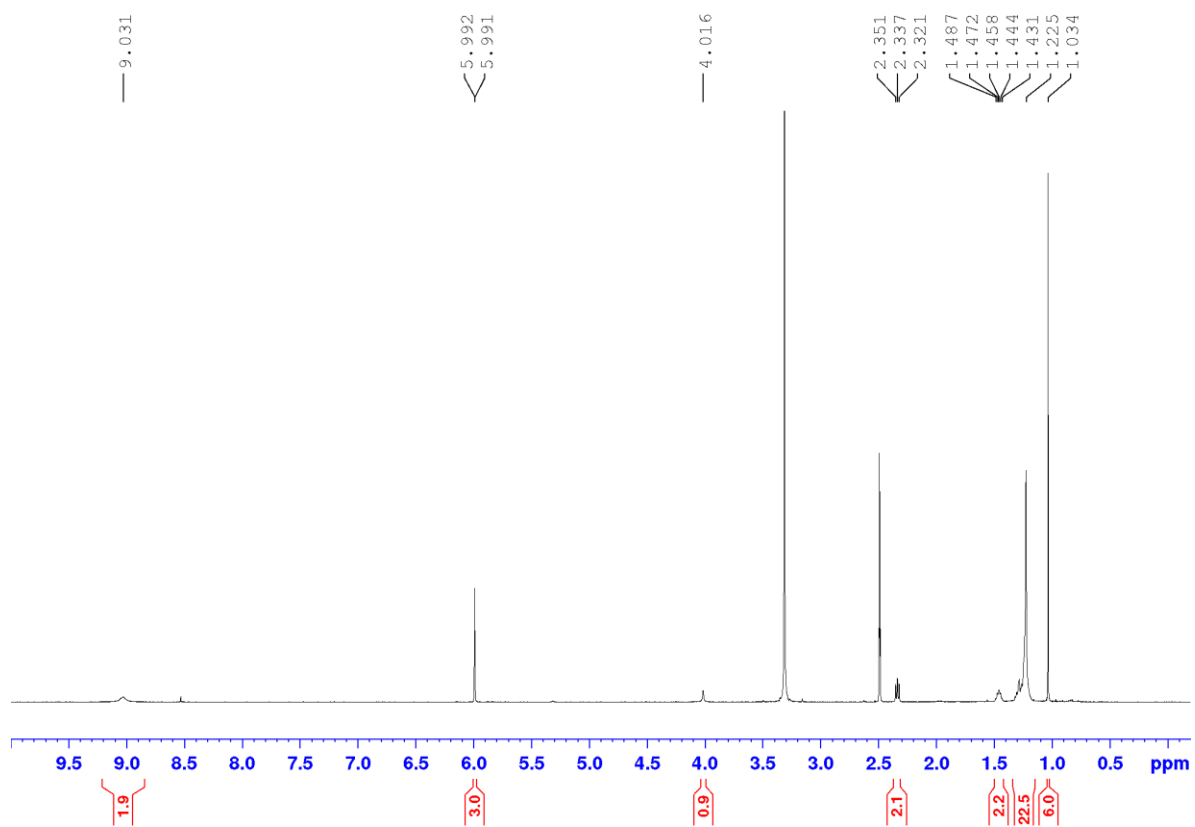

28

29

Figure S4.  $^1\text{H}$ -NMR spectrum (500 MHz, DMSO- $d_6$ ) of loseolamycin A1, complete spectrum.

30

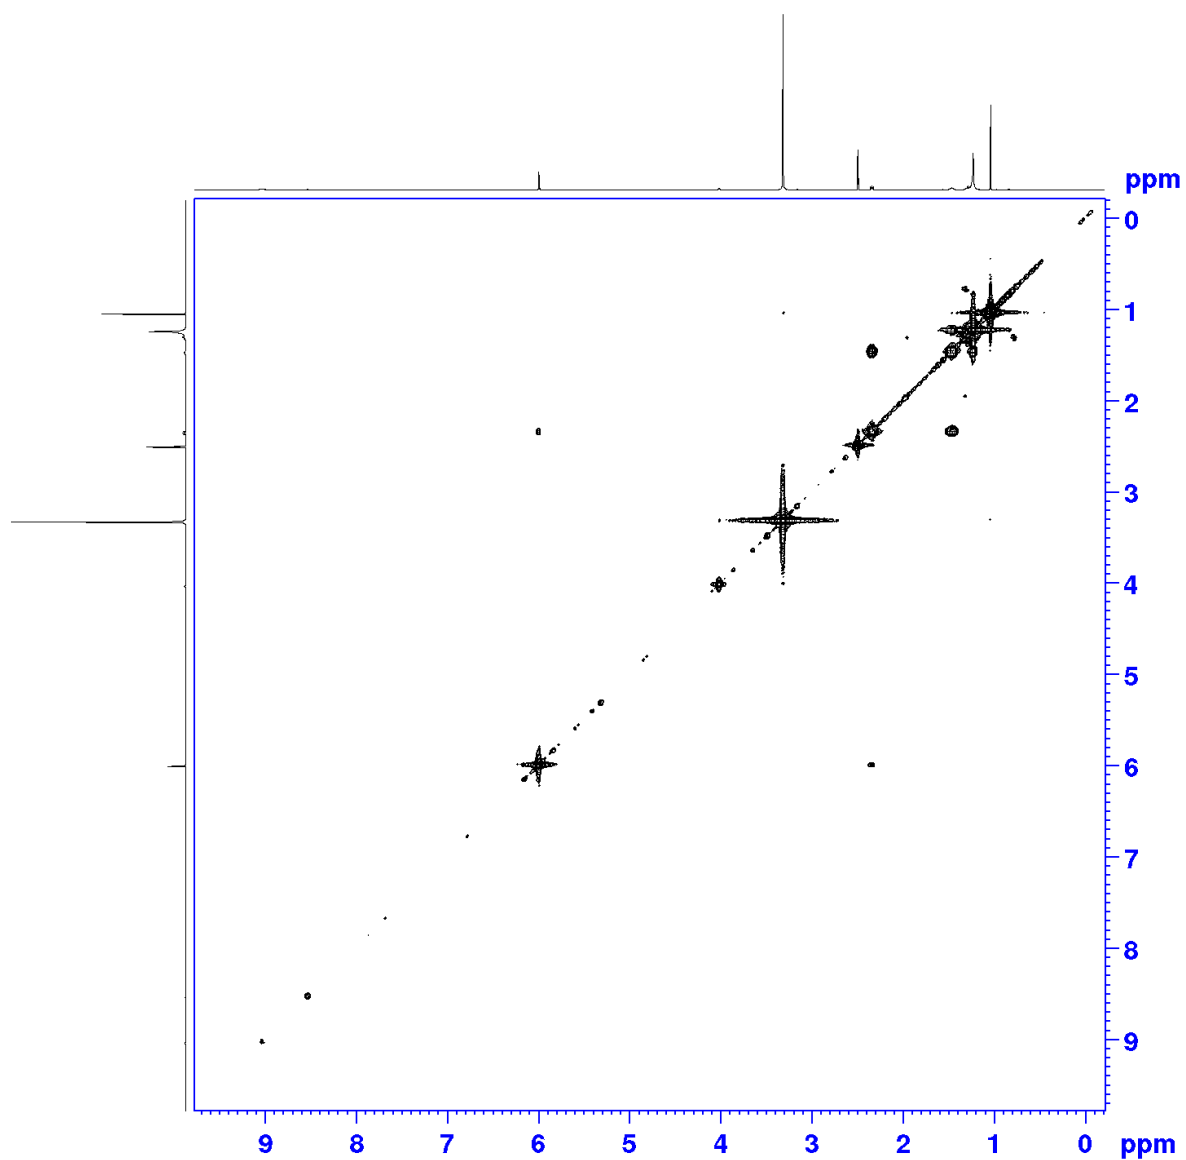

31

32

Figure S5.  $^1\text{H}$ - $^1\text{H}$ -COSY spectrum (500 MHz, DMSO- $d_6$ ) of loseolamycin A1, complete spectrum.

33

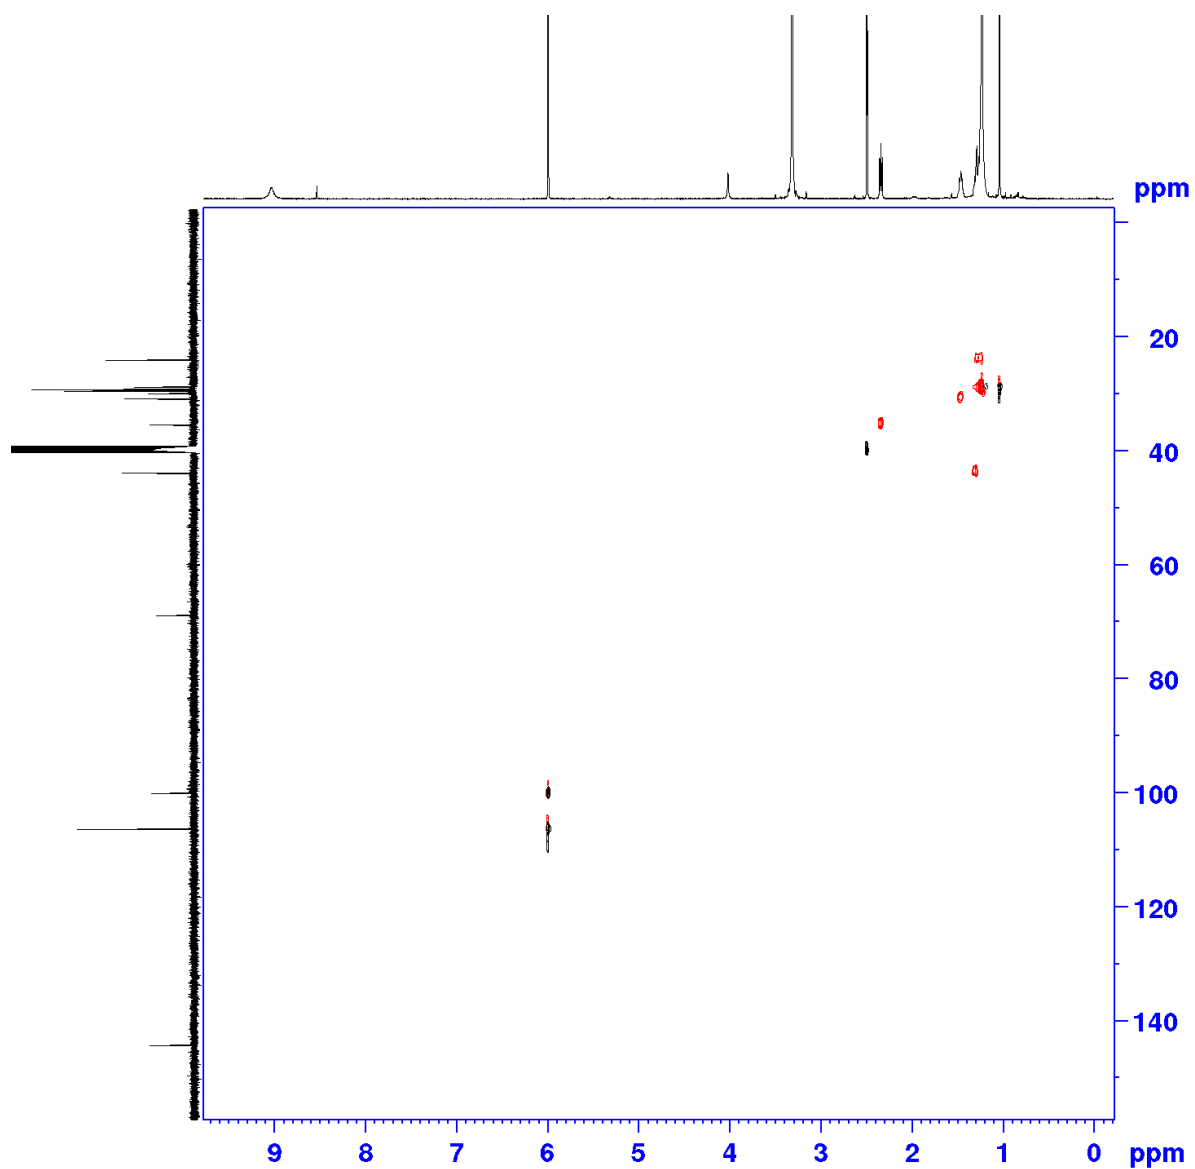

34

35

Figure S6. HSQC-spectrum (500 MHz; 125 MHz, DMSO-d6) of loseolamycin A1, complete spectrum.

36

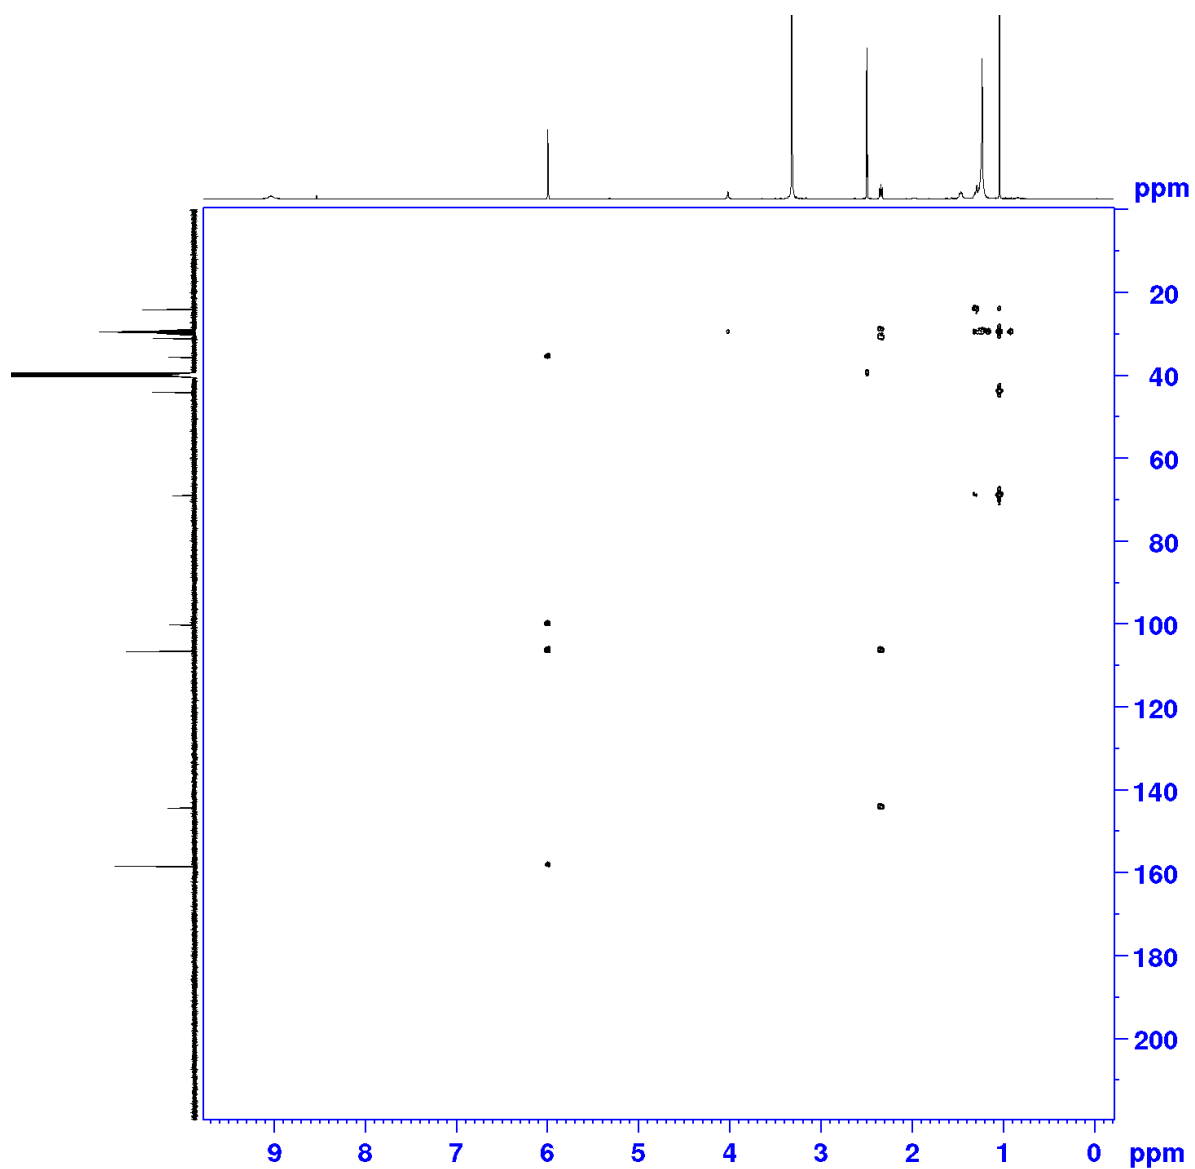

37

38

Figure S7. HMBC-spectrum (500 MHz; 125 MHz, DMSO-d<sub>6</sub>) of loseolamycin A1, complete spectrum.



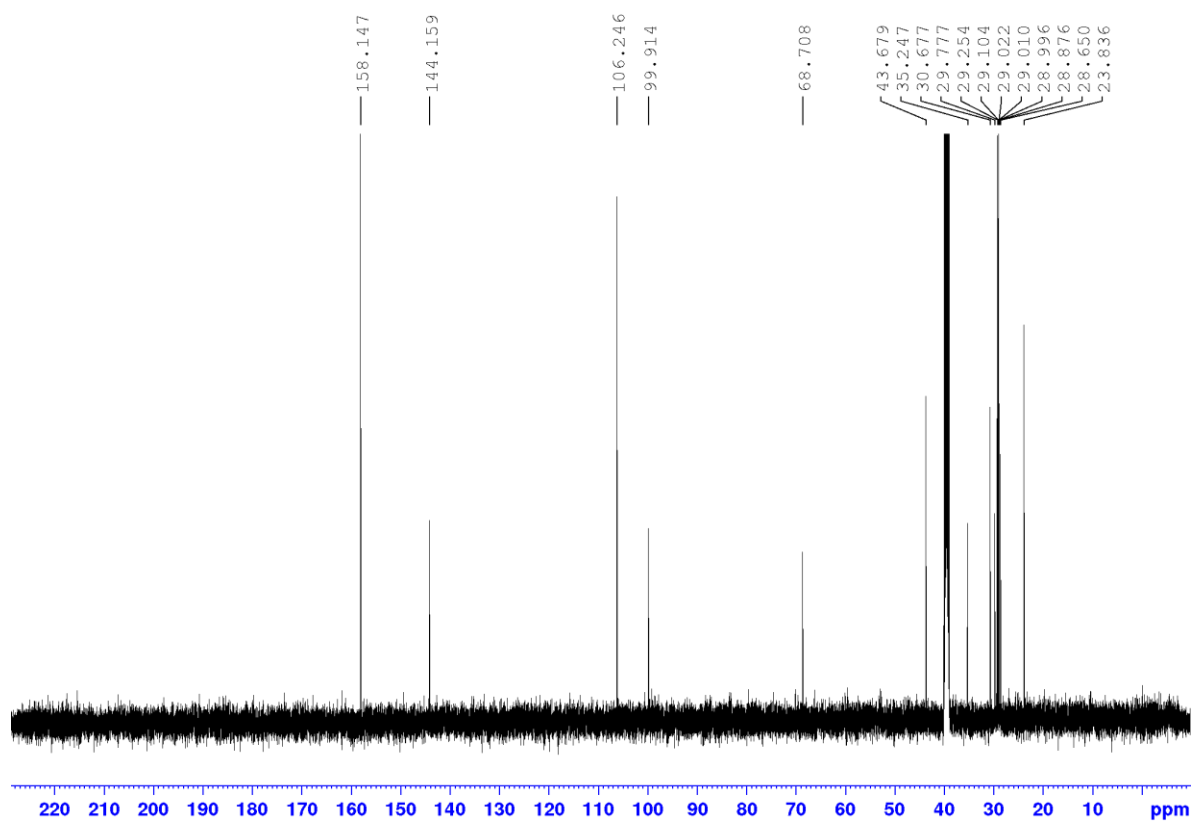

39

40

Figure S8.  $^{13}\text{C}$ -spectrum (125 MHz, DMSO- $d_6$ ) of loseolamycin A1, complete spectrum.

41

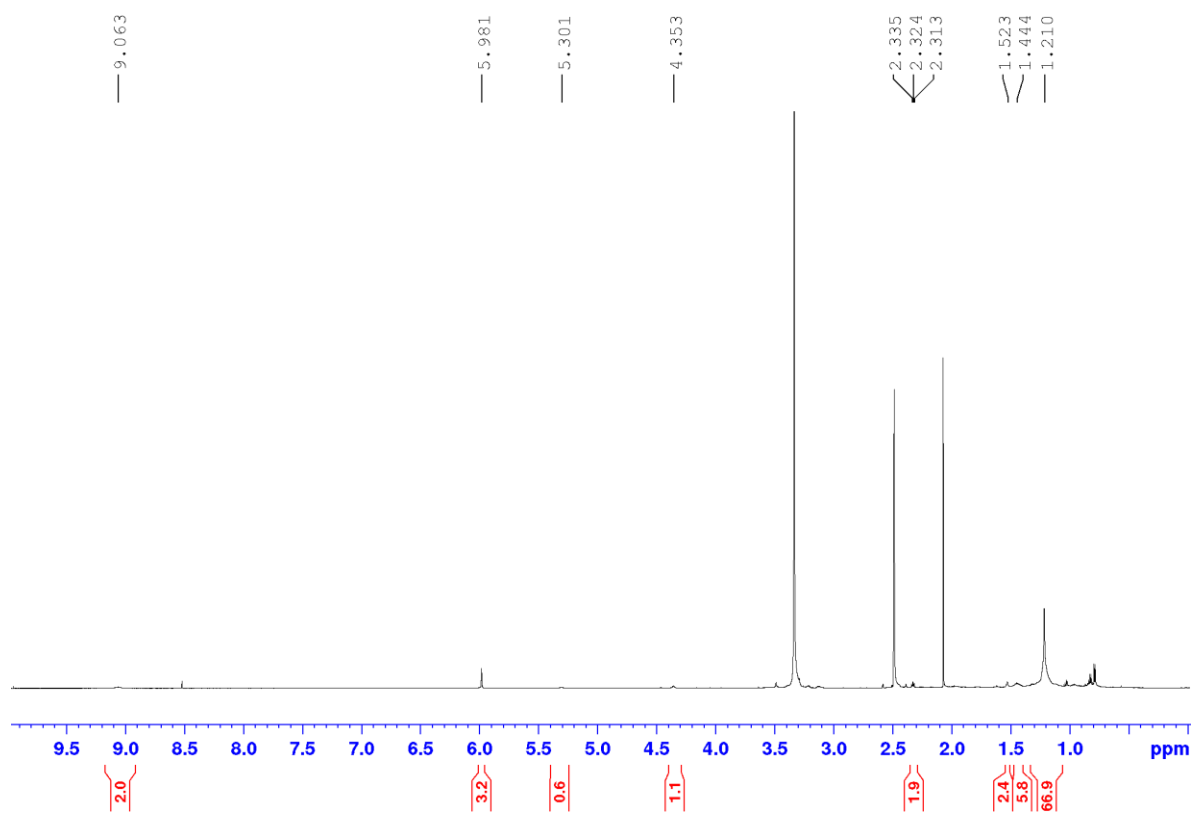

42

43

Figure S9.  $^1\text{H}$ -NMR spectrum (500 MHz,  $\text{DMSO-d}_6$ ) of loseolamycin A2, complete spectrum.

44

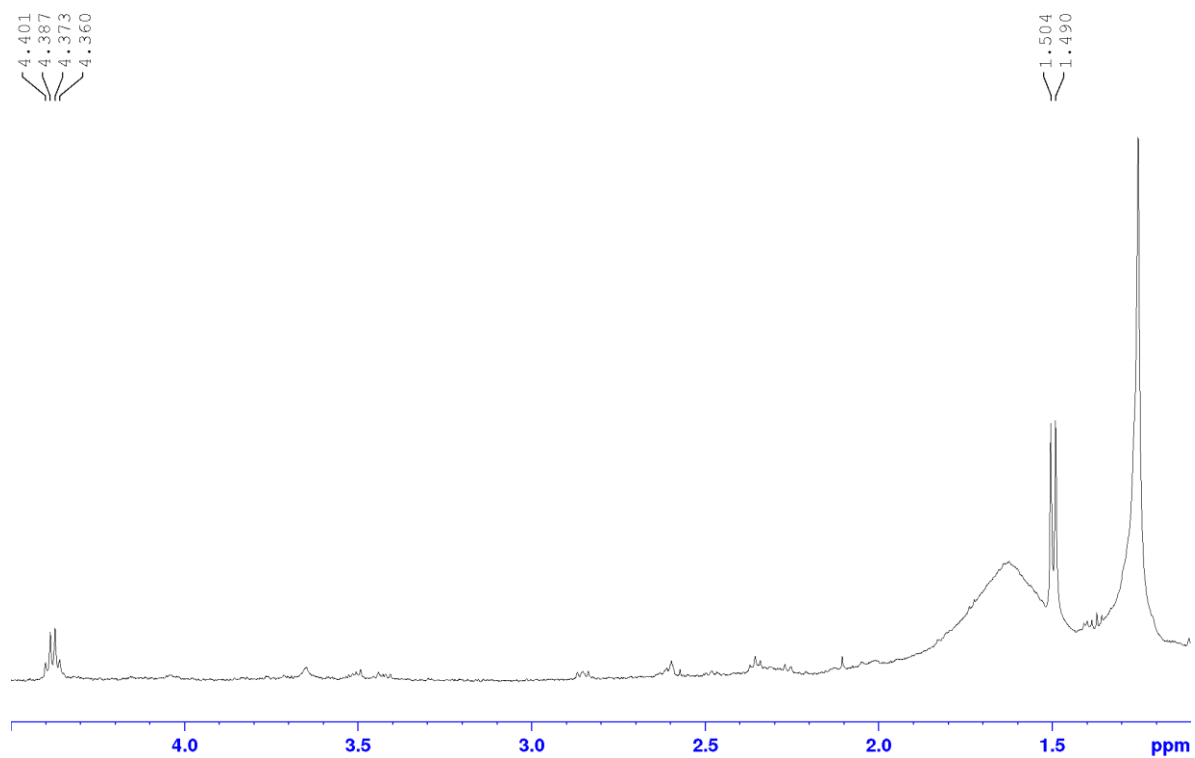

45

46

Figure S10. <sup>1</sup>H-NMR spectrum (500 MHz, CDCl<sub>3</sub>) of loseolamycin A2, zoomed from 1.0 – 4.5 ppm.

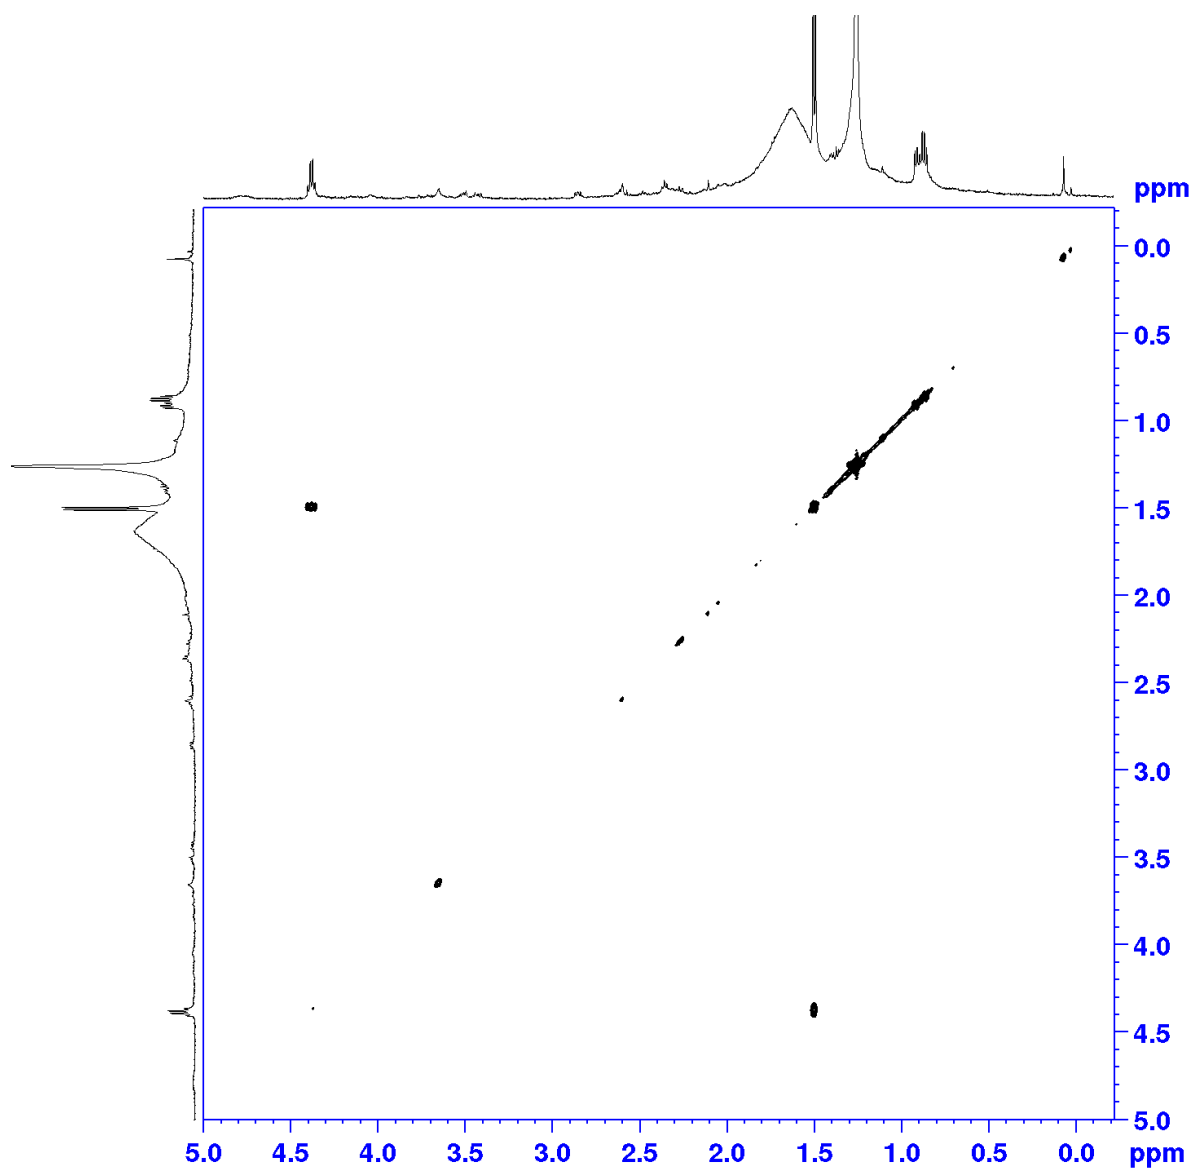

47

48

Figure S11.  $^1\text{H}$ - $^1\text{H}$ -COSY (500 MHz,  $\text{CDCl}_3$ ) of loseolamycin A2, zoomed from 1.0 – 4.5 ppm.

49

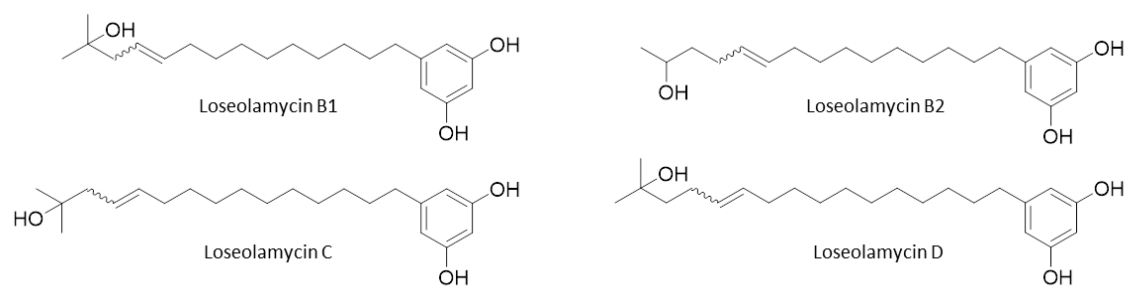

50

51 **Figure S12.** Proposed structures of loseolamycins B1 (compound 3), B2 (compound 4), C (compound 5) and D (compound  
52 6) based on MS/MS experiments.

53

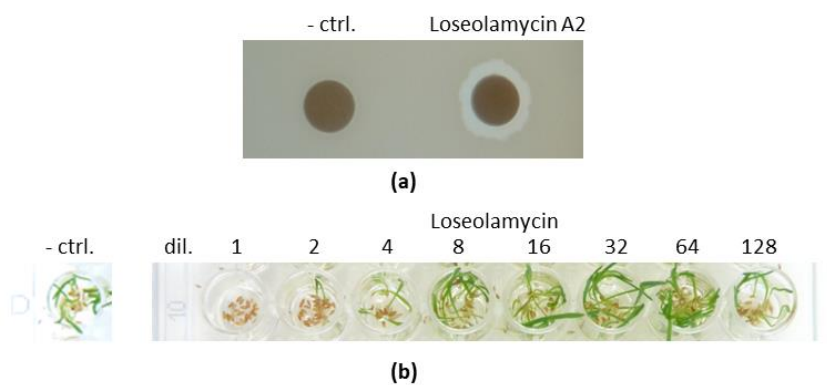

54

55 **Figure S13.** Antibacterial and herbicidal activity. (a) Loseolamycin A2 on a filter disc inhibits the growth of *B. subtilis*. The  
56 sample's solvent methanol was used as negative control (- ctrl) and shows no inhibition zone. (b) A mixture of loseolamycin  
57 derivatives inhibits germination of the weed *Agrostis stolonifera*. The phytotoxic effect was reproduced once and is  
58 concentration dependent. Methanol in plant medium was used as negative control (- ctrl) and shows no inhibition of seed  
59 germination.

60

61

62

63 **Table S1.** Organisms, BACs, plasmids and primer used in this work.

| Material                                  | Purpose                                                                                                               |
|-------------------------------------------|-----------------------------------------------------------------------------------------------------------------------|
| <b>A. Organisms</b>                       |                                                                                                                       |
| <i>Micromonospora endolithica</i> LU17765 | originating strain of type III PKS [BASF]                                                                             |
| <i>Streptomyces albus</i> Del14           | optimized heterologous host [1]                                                                                       |
| <i>Escherichia coli</i> GB05 RedCC        | cloning host [Helmholtz-Institut für Pharmazeutische Forschung Saarland (HIPS)]                                       |
| <i>Escherichia coli</i> ET12567 pUB307    | alternate host intergeneric conjugation [2]                                                                           |
| <i>Escherichia coli</i> GB 2005           | bioactivity test                                                                                                      |
| <i>Pseudomonas putida</i> KT2440          | bioactivity test                                                                                                      |
| <i>Bacillus subtilis</i> ATCC 6633        | bioactivity test                                                                                                      |
| <i>Agrostis stolonifera</i>               | bioactivity test                                                                                                      |
| <b>B. BACs</b>                            |                                                                                                                       |
| I7 [IG652BAC1-2]                          | heterologous expression of type III PKS [GenBank: MT904273]                                                           |
| I7act                                     | heterologous expression of promoter activated type III PKS                                                            |
| <b>C. Plasmids</b>                        |                                                                                                                       |
| pUC19                                     | promoter TS61 / ampicillin resistance marker                                                                          |
| <b>D. PCR primer</b>                      |                                                                                                                       |
| 20180710_02_fw [I7act]                    | TGAATCAGATTTGCGAGTCCCGCAGTCGCGAACGGACCGACTCGTTGGTCGT<br>CAGGTGGCACTTTTCG                                              |
| 20180710_02_rev [I7act]                   | CACCGGCACGCCCATGTCCCCACCTCTCGTCCCCGATCCCCACGCTTCGCGG<br>ATATCCTACTATGCCGAGGTATAATGTAGCCAGCGTGTTACCAATGCTTAATCA<br>GTG |

64

65

## 66 REFERENCES

- 67 [1] M. Myronovskyi, B. Rosenkränzer, S. Nadmid, P. Pujic, P. Normand, A. Luzhetskyy,  
68 Generation of a cluster-free *Streptomyces albus* chassis strains for improved heterologous  
69 expression of secondary metabolite clusters, *Metab. Eng.* 49 (2018) 316–324.  
70 <https://doi.org/10.1016/j.ymben.2018.09.004>.
- 71 [2] F. Flett, V. Mersinias, C.P. Smith, High efficiency intergeneric conjugal transfer of plasmid  
72 DNA from *Escherichia coli* to methyl DNA-restricting streptomycetes, *FEMS Microbiol. Lett.*  
73 155 (2006) 223–229. <https://doi.org/10.1111/j.1574-6968.1997.tb13882.x>.

74
